# Supplementary material
Source: PubMed Central journal article supplement (PMC5963012)

## Supplementary Online Content

Navar AM, Taylor B, Mulder H, et al. Association of prior authorization and out-of-pocket costs with patient access to PCSK9 inhibitor therapy. *JAMA Cardiol*. Published online September 27, 2017. doi:10.1001/jamacardio.2017.3451.

**eTable 1:** ICD-9 and ICD-10 Codes Used to Identify ASCVD

**eTable 2:** Characteristics of Patients Prescribed PCSK9i in the Overall, Clinical, and Lab Subsample

**eTable 3:** Factors associated with approval in multivariable analysis, Overall Sample, Clinical, and Lab Subsample

**eFigure:** Duration from Initial Prescription Submission and Time to Approval

This supplementary material has been provided by the authors to give readers additional information about their work.

**eTable 1: ICD-9 and ICD-10 Codes Used to Identify ASCVD**

|                                      |                                                                                                                                                        |                                                                                     |
|--------------------------------------|--------------------------------------------------------------------------------------------------------------------------------------------------------|-------------------------------------------------------------------------------------|
| <b>Coronary Artery Disease</b>       | Prior myocardial infarction<br>Acute or chronic ischemic heart disease<br>Stable coronary artery disease<br>Ischemic cardiomyopathy<br>Unstable angina | 410-414, 429.2, I20-I25                                                             |
| <b>Peripheral Arterial Disease</b>   | Claudication, Peripheral Atherosclerosis                                                                                                               | 440.2, 440.3, 440.4, 440/8, 440.9, I70.2, I70.3, I70.4, I70.5, I70.7                |
| <b>Cerebrovascular Disease</b>       | Stroke, TIA, Precerebral Atherosclerosis, Other Cerebrovascular Disease                                                                                | 433, 434, 435, 436, I63, I65, I66, I67                                              |
| <b>Other Atherosclerotic Disease</b> | Other Atherosclerosis<br>Atheroembolism<br>Abdominal Aortic Aneurysm                                                                                   | 440*, 440.1, 441.3, 441.4, 443.9, I70.0, I70.1, I70.8, I70.90, I70.91, I71.3, I71.4 |

**eTable 2: Characteristics of Patients Prescribed PCSK9i in the Overall, Clinical, and Lab Subsample**

|                  | Overall Sample<br>N=45,029 | Sample w/ clinical<br>characteristics<br>N=17,851 | Sample w/ lab<br>characteristics<br>N=5,383 |
|------------------|----------------------------|---------------------------------------------------|---------------------------------------------|
| <b>Age</b>       |                            |                                                   |                                             |
| <45 years        | 1702 (3.8%)                | 545 (3.1%)                                        | 168 (3.1%)                                  |
| 45-54 years      | 5239 (11.6%)               | 1877 (10.5%)                                      | 594 (11.0%)                                 |
| 55-64 years      | 12591 (28.0%)              | 4736 (26.5%)                                      | 1457 (27.1%)                                |
| 65-74 years      | 16660 (37.0%)              | 6905 (38.7%)                                      | 2021 (37.5%)                                |
| 75+ years        | 8837 (19.6%)               | 3788 (21.2%)                                      | 1143 (21.2%)                                |
|                  |                            |                                                   |                                             |
| Sex (% Female)   | 23065 (51.2%)              | 9328 (52.3%)                                      | 2749 (51.1%)                                |
|                  |                            |                                                   |                                             |
| <b>Clinical</b>  | N/a                        |                                                   |                                             |
| Prior ASCVD      | N/a                        | 12186 (68.3%)                                     | 3662 (68.0%)                                |
| CAD              | N/a                        | 10869 (60.9%)                                     | 3294 (61.2%)                                |
| PAD              | N/a                        | 3262 (18.3%)                                      | 891 (16.6%)                                 |
| CVD              | N/a                        | 4235 (23.7%)                                      | 1196 (22.2%)                                |
|                  |                            |                                                   |                                             |
| <b>Pharmacy</b>  |                            |                                                   |                                             |
| Retail           | 35234 (78.2%)              | 14127 (79.1%)                                     | 4266 (79.2%)                                |
| Institutional    | 239 (0.5%)                 | 73 (0.4%)                                         | 21 (0.4%)                                   |
| Mail Order       | 255 (0.6%)                 | 118 (0.7%)                                        | 38 (0.7%)                                   |
| Specialty        | 9300 (20.7%)               | 3533 (19.8%)                                      | 1058 (19.7%)                                |
|                  |                            |                                                   |                                             |
| <b>Provider</b>  |                            |                                                   |                                             |
| Cardiology       | 21767 (48.3%)              | 9318 (52.2%)                                      | 3225 (59.9%)                                |
| General practice | 16593 (36.8%)              | 6029 (33.8%)                                      | 1505 (28.0%)                                |
| Endocrinology    | 2234 (5.0%)                | 884 (5.0%)                                        | 211 (3.9%)                                  |
| Other            | 4435 (9.8%)                | 1620 (9.1%)                                       | 442 (8.2%)                                  |
|                  |                            |                                                   |                                             |

|                               |               |               |              |
|-------------------------------|---------------|---------------|--------------|
| <b>Payor</b>                  |               |               |              |
| Commercial only               | 17999 (40.0%) | 6547 (36.7%)  | 2068 (38.4%) |
| Government only               | 23652 (52.5%) | 9977 (55.9%)  | 2888 (53.7%) |
| Commercial + government       | 2043 (4.5%)   | 894 (5.0%)    | 286 (5.3%)   |
|                               |               | 433 (2.4%)    | 141 (2.6%)   |
| <b>Statin Use</b>             |               |               |              |
| High intensity statin         | N/a           | 2071 (11.6%)  | 653 (12.1%)  |
| Moderate-Low intensity statin | N/a           | 2053 (11.5%)  | 589 (10.9%)  |
| No Statin                     | N/a           | 13727 (76.9%) | 4141 (76.9%) |
|                               |               |               |              |
| <b>EZE Use</b>                | N/a           |               |              |
| Yes                           | N/a           | 1874 (10.5%)  | 640 (11.9%)  |
| No                            | N/a           | 15977 (89.5%) | 4743 (88.1%) |
|                               |               |               |              |
| <b>Other LLT</b>              | N/a           |               |              |
| Yes                           | N/a           | 2072 (11.6%)  | 581 (10.8%)  |
| No                            | N/a           | 15779 (88.4%) | 4802 (89.2%) |
|                               |               |               |              |
| <b>LAB: last LDL</b>          |               |               |              |
| <70                           | N/a           | N/a           | 548 (10.2%)  |
| 70-99                         | N/a           | N/a           | 726 (13.5%)  |
| 100-129                       | N/a           | N/a           | 1031 (19.2%) |
| 130-159                       | N/a           | N/a           | 1246 (23.1%) |
| 160-189                       | N/a           | N/a           | 941 (17.5%)  |
| >=190                         | N/a           | N/a           | 891 (16.6%)  |

**eTable 3: Factors associated with approval in multivariable analysis, Overall Sample, Clinical, and Lab Subsample**

|                          | Overall Sample<br>N=45,029 | Clinical Subsample<br>N=17,851 | Lab Subsample<br>N=5,383 |
|--------------------------|----------------------------|--------------------------------|--------------------------|
| Model Variable           | OR (95% CI)                | OR (95% CI)                    | OR (95% CI)              |
| Age (Ref: <45)           |                            |                                |                          |
| 45-54                    | 1.26 (1.11 - 1.43)         | 1.26 (1.01 - 1.59)             | 1.31 (0.87 - 1.98)       |
| 55-64                    | 1.33 (1.18 - 1.5)          | 1.39 (1.13 - 1.73)             | 1.48 (1 - 2.19)          |
| 65-74                    | 1.83 (1.62 - 2.06)         | 1.89 (1.52 - 2.34)             | 1.90 (1.28 - 2.82)       |
| 75+                      | 1.84 (1.62 - 2.08)         | 1.93 (1.55 - 2.41)             | 1.79 (1.19 - 2.69)       |
|                          |                            |                                |                          |
| Female v. Male           | 0.87 (0.83 - 0.91)         | 0.91 (0.85 - 0.97)             | 0.95 (0.84 - 1.08)       |
|                          |                            |                                |                          |
| Pharmacy                 |                            |                                |                          |
| Specialty vs. Retail     | 1.76 (1.66 - 1.86)         | 1.80 (1.64 - 1.98)             | 1.96 (1.66 - 2.33)       |
| Mail Order               | 9.28 (6.47-13.3)           | 1.92 (1.17 - 3.13)             | 6.43 (2.67 - 15.50)      |
| Institutional            | 1.35 (1.03-1.77)           | 6.69 (4.06 - 11.00)            | 4.98 (1.83 - 13.60)      |
|                          |                            |                                |                          |
|                          |                            |                                |                          |
| Specialty (Ref: General) |                            |                                |                          |
| Cardiologist             | 1.49 (1.42 - 1.56)         | 1.41 (1.32 - 1.52)             | 1.42 (1.24 - 1.63)       |
| Endocrinologist          | 1.24 (1.13 - 1.37)         | 1.23 (1.05 - 1.43)             | 1.03 (0.75 - 1.42)       |
| Other                    | 1.21 (1.13 - 1.30)         | 1.27 (1.12 - 1.43)             | 1.37 (1.08 - 1.73)       |
|                          |                            |                                |                          |
| Payor (Ref: Commercial)  |                            |                                |                          |
| Government               | 2.85 (2.7 - 3.0)           | 3.1 (2.85 - 3.38)              | 3.27 (2.79 - 3.83)       |
| Gov + Commercial         | 2.9 (2.62 - 3.22)          | 2.79 (2.37 - 3.27)             | 2.6 (1.95 - 3.46)        |
|                          |                            |                                |                          |

|                                    |                    |                    |                    |
|------------------------------------|--------------------|--------------------|--------------------|
| PBM (Ref: None of top 10)          |                    |                    |                    |
| PBM 1                              | 2.09 (1.90 - 2.30) | 2.09 (1.78 - 2.45) | 2.32 (1.73 - 3.13) |
| PBM 2                              | 0.99 (0.81 - 1.21) | 1.23 (0.91 - 1.66) | 1.15 (0.67 - 1.98) |
| PBM 3                              | 0.74 (0.65 - 0.84) | 0.71 (0.58 - 0.86) | 0.95 (0.66 - 1.37) |
| PBM 4                              | 0.81 (0.76 - 0.88) | 0.88 (0.78 - 0.99) | 0.75 (0.6 - 0.93)  |
| PBM 5                              | 0.82 (0.77 - 0.89) | 0.83 (0.74 - 0.93) | 0.76 (0.61 - 0.94) |
| PBM 6                              | 1.26 (1.16 - 1.37) | 1.24 (1.09 - 1.41) | 1.19 (0.94 - 1.5)  |
| PBM 7                              | 1.26 (1.10 - 1.45) | 1.48 (1.19 - 1.83) | 1.32 (0.92 - 1.92) |
| PBM 8                              | 0.82 (0.76 - 0.88) | 0.78 (0.7 - 0.88)  | 0.77 (0.62 - 0.95) |
| PBM 9                              | 1.10 (1.00 - 1.21) | 1.19 (1.02 - 1.39) | 1.22 (0.92 - 1.62) |
| PBM 10                             | 0.44 (0.36 - 0.54) | 0.50 (0.37 - 0.67) | 0.54 (0.32 - 0.9)  |
|                                    |                    |                    |                    |
| Indication                         |                    |                    |                    |
| Prior ASCVD v. Primary             |                    | 1.19 (1.11 - 1.28) | 1.18 (1.04 - 1.35) |
|                                    |                    |                    |                    |
| Medication                         |                    |                    |                    |
| High Intensity Statin v. No Statin |                    | 1.07 (0.96 - 1.18) | 1.03 (0.85 - 1.24) |
| Low/Moderate Statin v. No Statin   |                    | 1.02 (0.92 - 1.13) | 1.14 (0.94 - 1.38) |
|                                    |                    |                    |                    |
| Ezetimibe v. No                    |                    | 1.22 (1.1 - 1.36)  | 1.29 (1.07 - 1.56) |
|                                    |                    |                    |                    |
| Other LLT vs. No                   |                    | 1.14 (1.03 - 1.26) | 1.22 (1.01 - 1.48) |
|                                    |                    |                    |                    |
| Last LDL-C (Ref: <70 mg/dL)        |                    |                    |                    |
| 70-99                              |                    |                    | 0.93 (0.73 - 1.19) |
| 100-129                            |                    |                    | 0.94 (0.74 - 1.18) |
| 130-159                            |                    |                    | 0.92 (0.73 - 1.15) |
| 160-189                            |                    |                    | 0.89 (0.7 - 1.12)  |

|      |  |  |                   |
|------|--|--|-------------------|
| 190+ |  |  | 0.9 (0.71 - 1.15) |
|------|--|--|-------------------|

**eFigure: Duration from Initial Prescription Submission and Time to Approval**

Histogram of the amount of time between the pharmacy first attempting to fill the prescription and when the patient is approved for therapy.

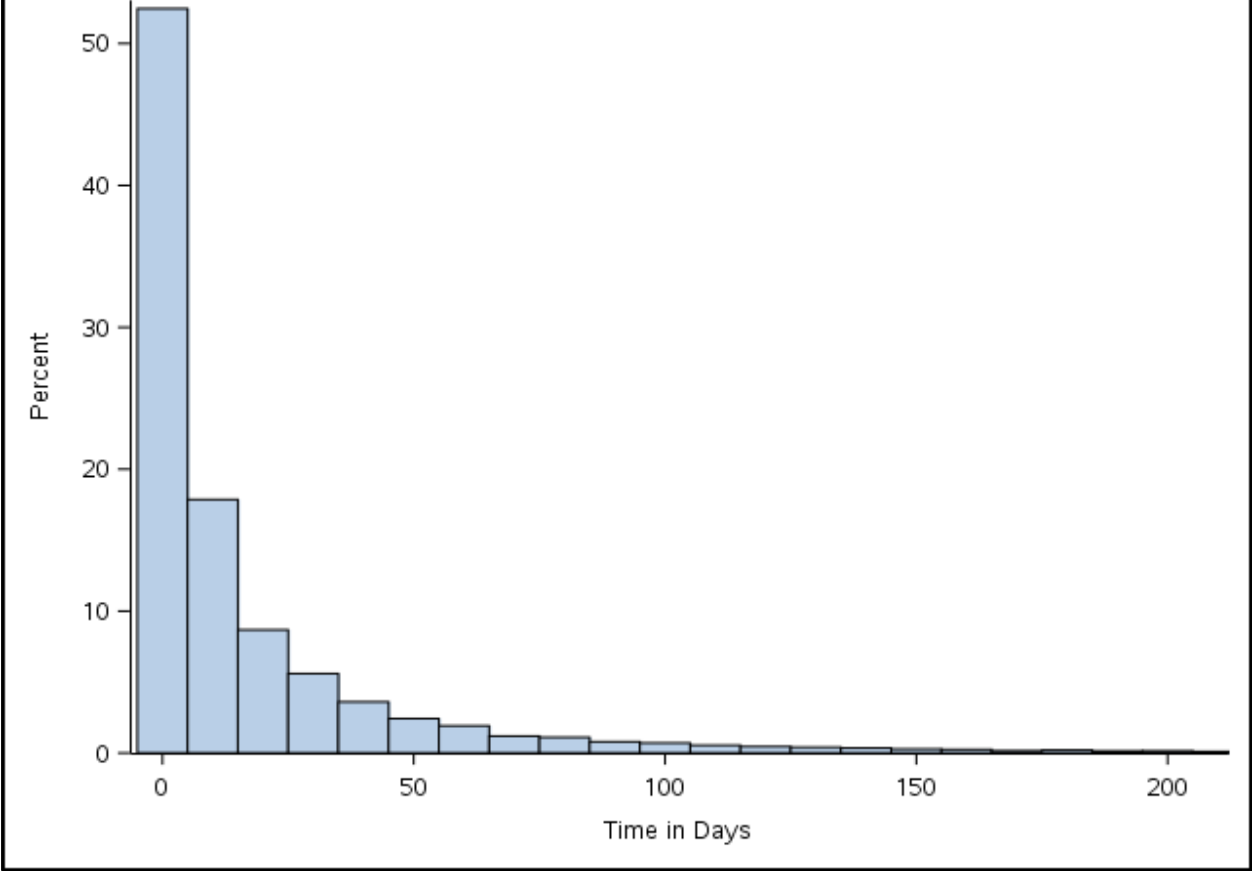

Supplement: jamacardiol-2-1217-s001.pdf [file jamacardiol-2-1217-s001.pdf]
